# Supplementary material
Source: HighWire-hosted journal article supplement (https://learnmem.cshlp.org/content/suppl/2024/03/22/31.3.a053901)
Supplement: Supplemental_Material.docx [file Supplemental_Material.docx]

Supplemental Materials for:

Adolescents flexibly adapt action selection based on controllability inferences

**Participant demographics**


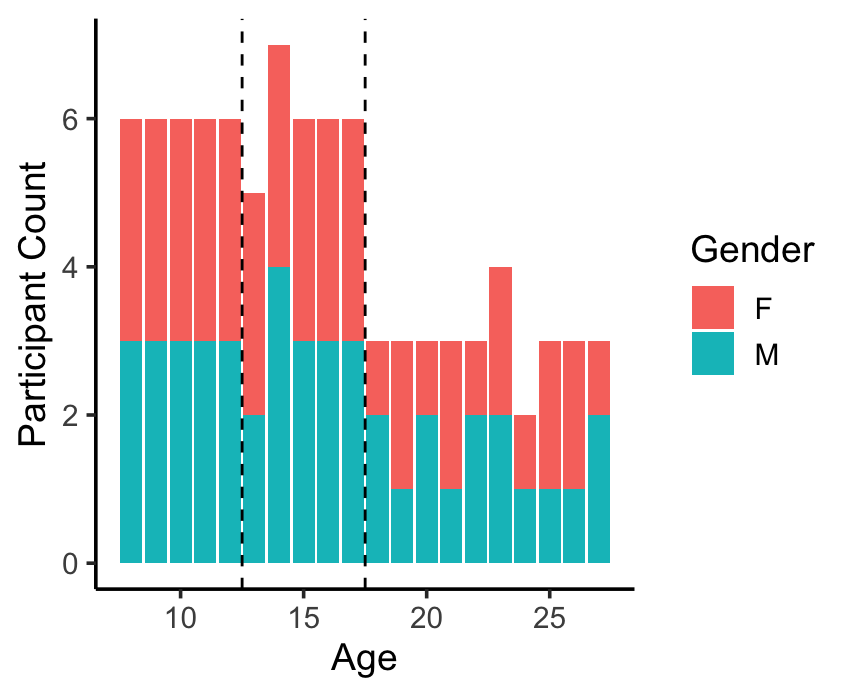


***Supplemental Figure S1. Participant age and sex distribution.*** *90 participants between the ages of 8 and 27 years were included in the analyses.*

**Modeling methods and results**

*Model-fitting procedure*

For each participant, we identified the fitted parameter values that maximized the likelihood of their choices using the fmincon function in the optimization toolbox in Matlab 2021a (The Mathworks Inc, 2021). We applied the following bounds and to each parameter: inverse temperature [0, 50]; initial stimulus and action values [−1, 1]; initial learning rate: [0, 100]; *w2* [0,1]. We randomly initialized each parameter, drawing uniformly from within their bounds. We initialized and ran fmincon 5 times per participant, and took the parameter estimates that maximized the log likelihood across runs.

*Model comparison*

We compared three versions of the computational models. The first model, which was previously introduced by [Dorfman and Gershman 2019](https://paperpile.com/c/5HHtTA/gi7r), included five free parameters: inverse temperature, initial stimulus and action value (one for each task condition; controllable or uncontrollable), and initial learning rate for each task condition. The second model was more concise and only had three parameters: inverse temperature, one initial stimulus and action value, and one initial learning rate. The third model was identical to the second model but included an additional free parameter: a second-stage initial Pavlovian weight (*w2*). This parameter was added to capture the possibility that controllability expectations might be biased by exposure to the first block of the task.


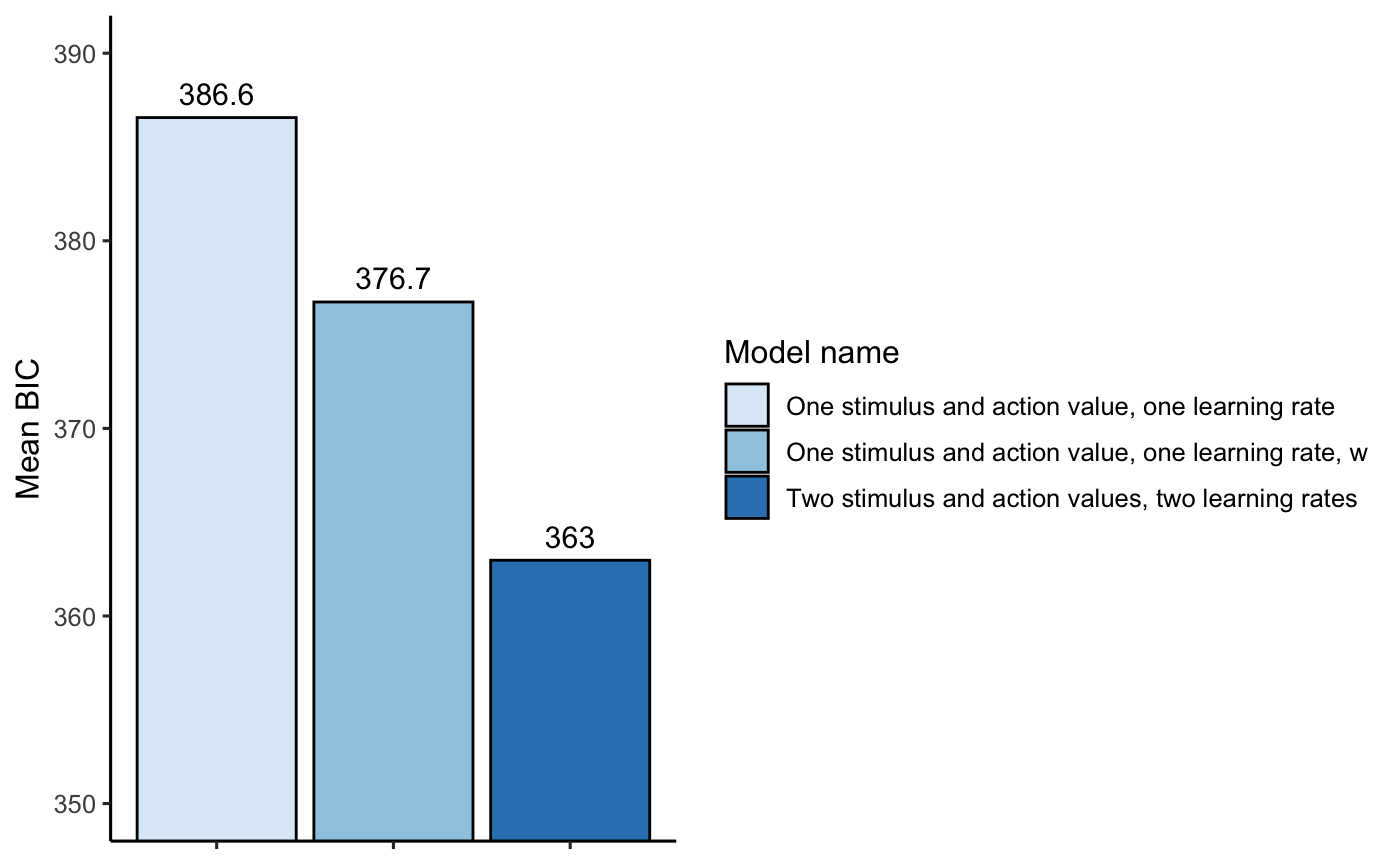


***Supplemental Figure S2****. Mean BIC values. Lower values indicate improved model fit. BIC: Bayesian information criterion.*

*Parameter recovery*

In order to evaluate the reliability of the models, we conducted a parameter recovery analysis in which we simulated data for 1000 agents from each of the three models, using parameter values that were sampled from the empirical range of fitted parameters for each respective model. We then fit the models to the simulated data. The model that demonstrated the best fit to the empirical data (see Supplemental Figure S2 above), which included two learning rates and two initial stimulus and action values (one for each condition), had poor parameter recoverability (with a range of *r* values from .29 to .76). In contrast, the two simpler models, which only had one learning rate and one initial stimulus and action value, had similar and higher recoverability (with a range of *r* values from .67 or .69 to .89 or .90). Of these two models, the one that included an additional second-stage initial Pavlovian weight (*w2*) parameter provided a better fit to the participant's data (see supplemental Figure S2). As a result, we used this model for our analysis.

*Posterior predictive checks*

We tested whether simulated data for the selected model, which included as free parameters an inverse temperature, one initial stimulus and action value, one initial learning rate, and a second-stage initial Pavlovian weight (*w2*) parameter accurately captured qualitative features of participants' actual choices. We generated 100 sets of simulated choices using each of the 90 participant's unique parameter combinations (i.e., 9000 simulated participants). Simulated choice behavior from the model reproduced the qualitative features of participants' actual choices (Supplemental Figure 3).

*
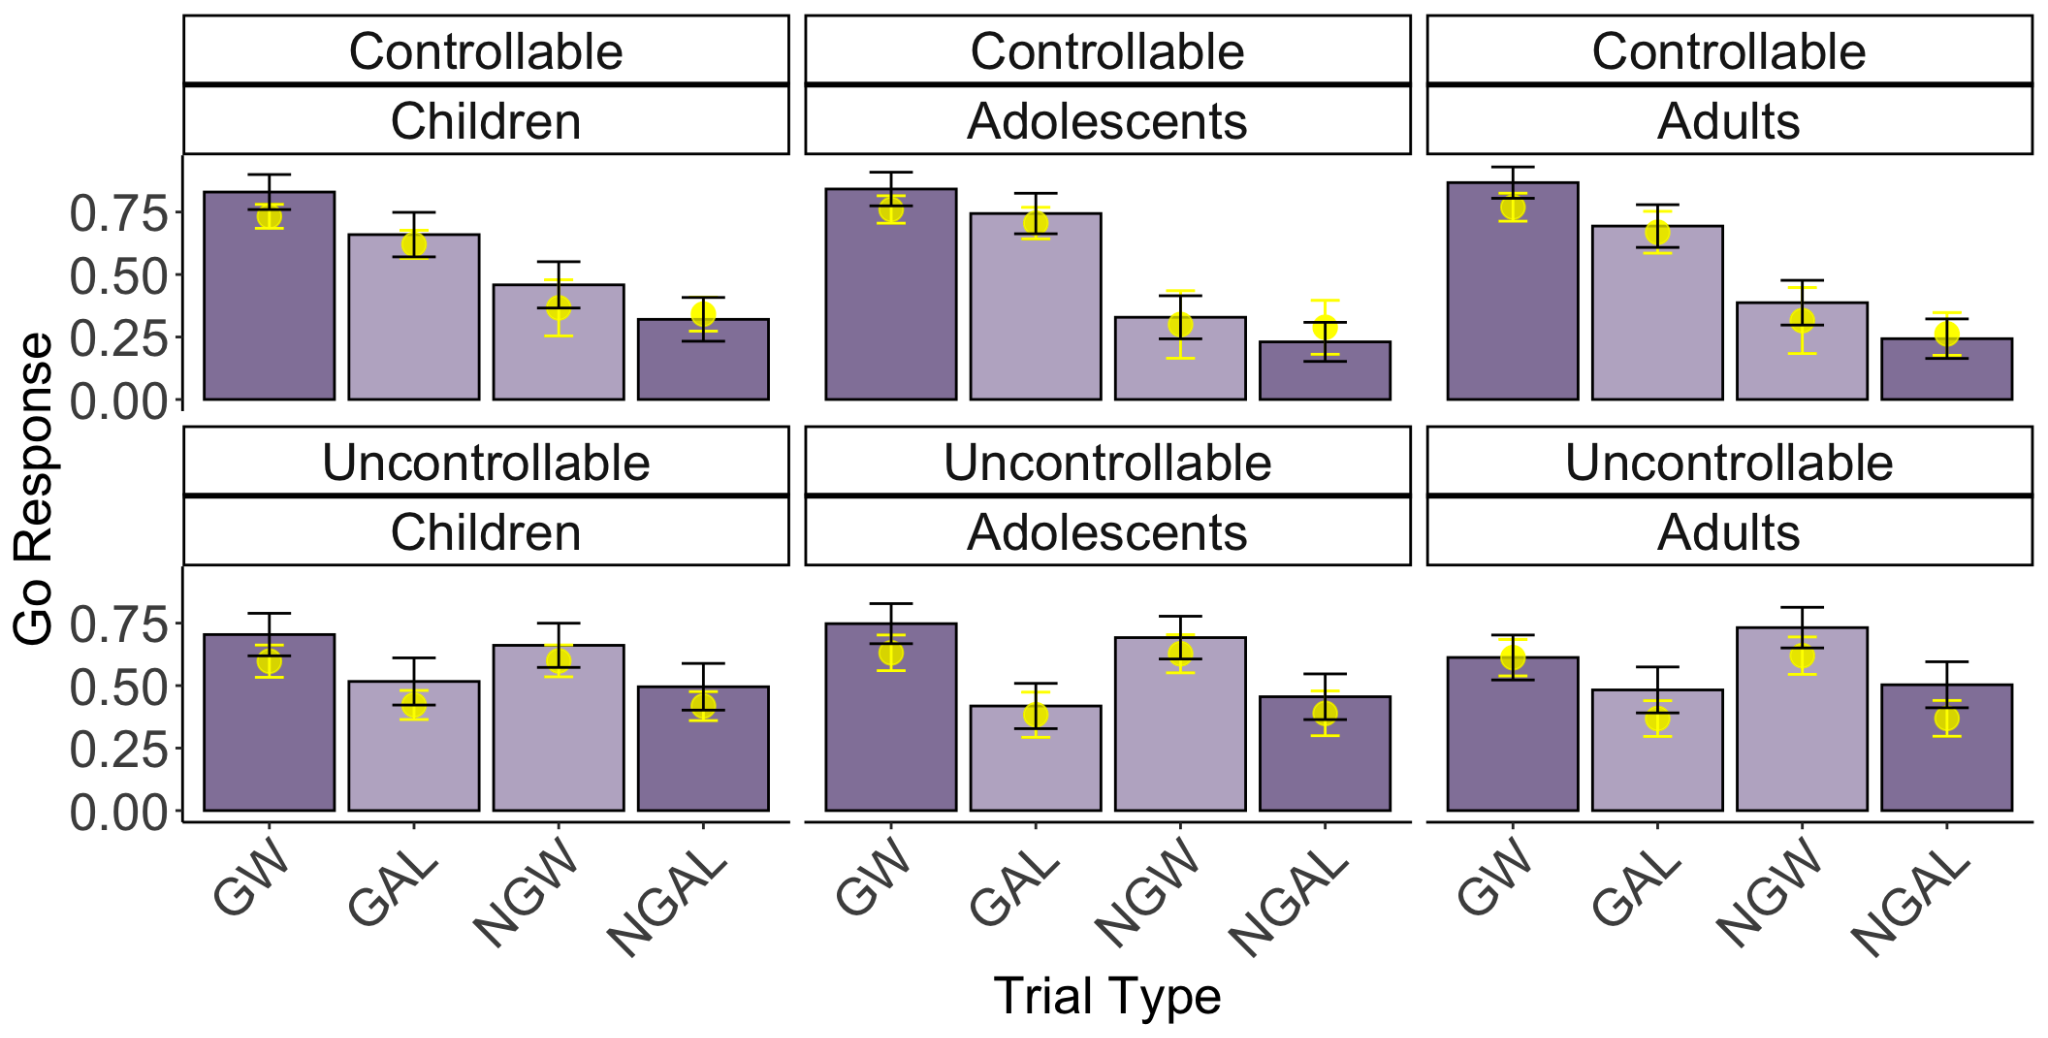
*

***Supplemental Figure S3.*** *Posterior predictive checks. The figure displays the simulated and actual mean accuracy for each trial type, separated by age group. Bars are shaded to indicate different trial conditions: darker shading represents trials where Pavlovian tendencies align with the instrumental contingency, while lighter shading represents trials where Pavlovian tendencies conflict with the optimal instrumental response. Mean accuracy values, calculated from simulated data using participant-specific parameter estimates from the selected model, are represented by yellow points. GW (Go to Win), GAL (Go to Avoid Losing), NGW (No-Go to Win), and NGAL (No-Go to Avoid Losing). Error bars represent ± 1 SEM.*

*.*

| Effect | df | F | p-value |
| --- | --- | --- | --- |
| Age group | 2, 84.00 | 0.08 | .920 |
| Trial number | 1, 84.00 | 0.06 | .801 |
| Order | 1, 84.00 | 17.24 *** | <.001 |
| Condition | 1, 84.00 | 23.64 *** | <.001 |
| Age group X Trial number | 1, 84.00 | 1.07 | .346 |
| Age group X Condition | 2, 84.00 | 3.43 * | .037 |
| Trial number X Order | 1, 84.00 | 6.26 * | .014 |
| Trial number X Condition | 1, 83.96 | 23.5 *** | <.001 |
| Order X Condition | 1, 84.00 | 20.78 *** | <.001 |
| Age group X Trial number X Order | 2, 84.00 | 2.25 | .111 |
| Age group X Trial number X Order | 2, 83.96 | 0.11 | .892 |
| Age group X Trial number X Condition | 2, 84.00 | 0.42 | .659 |
| Age group X Order X Condition | 2,83.96 | 0.5 | .610 |
| Condition X Trial number X Order | 1, 83.96 | 7.19 ** | .009 |
| Age group X Trial number X Order X Condition | 2, 83.96 | 0.11 | .895 |

***Supplemental Table S1:*** *Full model output for Figure 4:*

*w ~ Age Group * Order * Trial Number * Condition + (Trial Number * Condition + 1 | subjID).*

| Contrast | Estimate | SE | df | t.ratio | p.value |
| --- | --- | --- | --- | --- | --- |
| Con Controllable first - Uncon Controllable first | -0.00865 | 0.0412 | 84 | -0.21 | 0.8342 |
| Con Controllable first - Con Uncontrollable first | -0.10872 | 0.0649 | 84 | -1.675 | 0.0976 |
| Con Controllable first - Uncon Uncontrollable first | -0.37717 | 0.0642 | 123 | -5.877 | <.0001 |
| Uncon Controllable first - Con Uncontrollable first | -0.10008 | 0.0641 | 123 | -1.561 | 0.1211 |
| Uncon Controllable first - Uncon Uncontrollable first | -0.36853 | 0.0634 | 84 | -5.814 | <.0001 |
| Con Uncontrollable first - Uncon Uncontrollable first | -0.26845 | 0.0394 | 84 | -6.815 | <.0001 |

***Supplemental Table S2:*** *Post-Hoc tests for condition*order interaction from Table S1.*

| contrast | estimate | SE | df | t.ratio | p.value |
| --- | --- | --- | --- | --- | --- |
| Con Children - Uncon Children | -0.1139 | 0.0494 | 84 | -2.307 | 0.0235 |
| Con Children - Con Adolescents | 0.0404 | 0.0795 | 84 | 0.508 | 0.6128 |
| Con Children - Uncon Adolescents | -0.1993 | 0.0786 | 123 | -2.535 | 0.0125 |
| Con Children - Con Adults | -0.0214 | 0.0795 | 84 | -0.269 | 0.7883 |
| Con Children - Uncon Adults | -0.0834 | 0.0785 | 123 | -1.062 | 0.2905 |
| Uncon Children - Con Adolescents | 0.1543 | 0.0786 | 123 | 1.963 | 0.0519 |
| Uncon Children - Uncon Adolescents | -0.0854 | 0.0777 | 84 | -1.099 | 0.275 |
| Uncon Children - Con Adults | 0.0925 | 0.0785 | 123 | 1.178 | 0.2409 |
| Uncon Children - Uncon Adults | 0.0306 | 0.0776 | 84 | 0.394 | 0.6947 |
| Con Adolescents - Uncon Adolescents | -0.2397 | 0.0494 | 84 | -4.854 | <.0001 |
| Con Adolescents - Con Adults | -0.0618 | 0.0795 | 84 | -0.778 | 0.4388 |
| Con Adolescents - Uncon Adults | -0.1238 | 0.0785 | 123 | -1.576 | 0.1176 |
| Uncon Adolescents - Con Adults | 0.1779 | 0.0785 | 123 | 2.265 | 0.0252 |
| Uncon Adolescents - Uncon Adults | 0.1159 | 0.0776 | 84 | 1.494 | 0.139 |
| Con Adults - Uncon Adults | -0.062 | 0.0493 | 84 | -1.258 | 0.212 |

***Supplemental Table S3:*** *Post-Hoc tests for condition*age group interaction from Table S1.*

*Relations between model-derived parameters and age*

We evaluated the relations between the fitted parameters of the selected model and age, comparing models including only a linear effect of age and models including both linear and quadratic age-squared terms. Inclusion of the quadratic age-squared term did not improve the fit of any of the linear models (all *p’*s*>.15).* Linear age was not a meaningful predictor for any of the individual parameter values (all *p’*s*>.1)*.

*
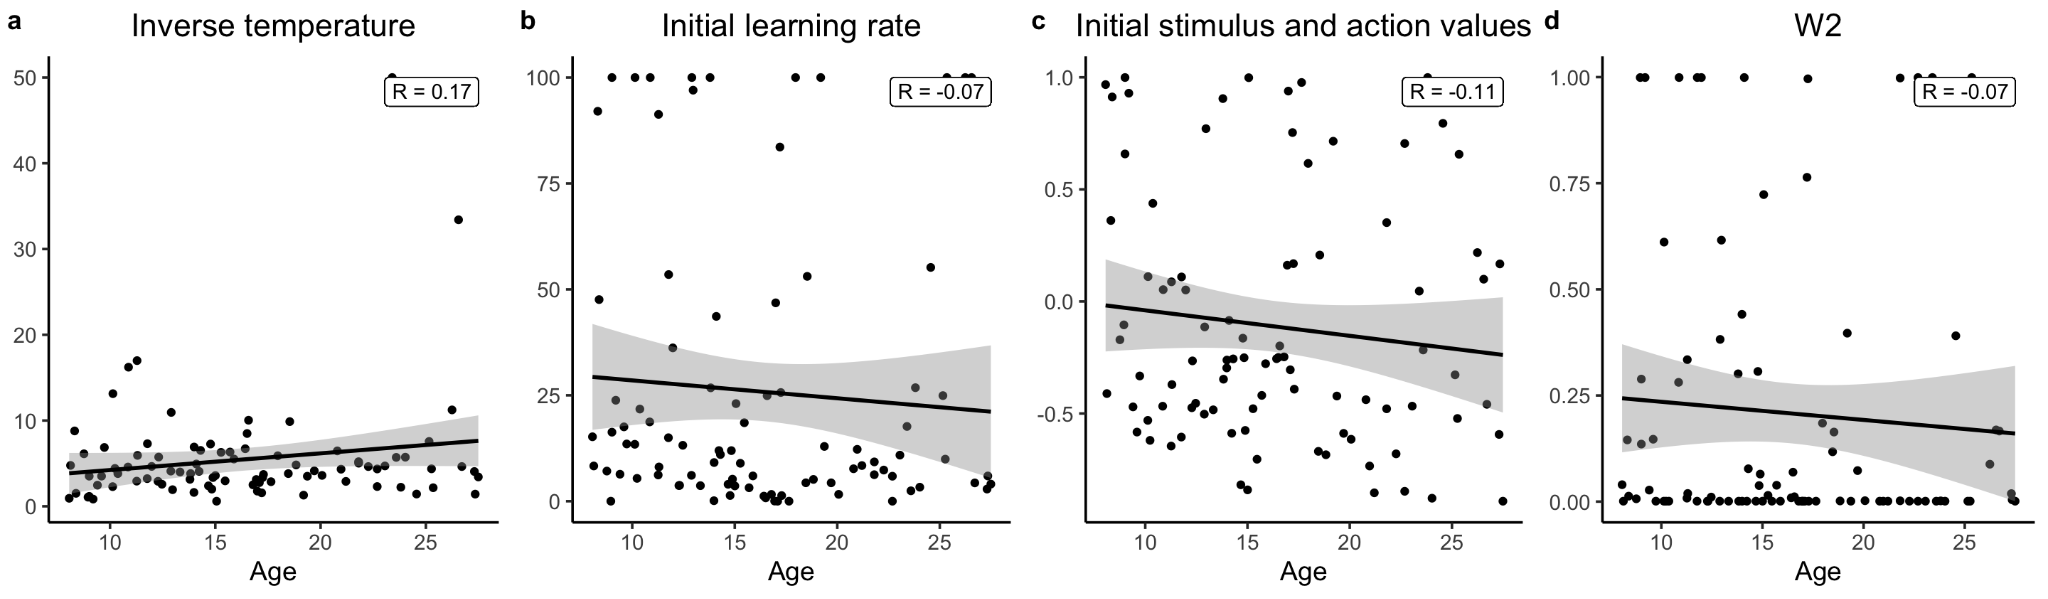
*

***Supplemental Figure S4.*** *Relation between age and model parameters. (a) inverse temperature. (b) Initial learning rate. (c) Initial stimulus and action values. (d)* second-stage initial Pavlovian weight. *Model-derived parameter estimates showed no evidence of age-related change. The relationship between age and each of the four-parameter estimates was best characterized by a linear function. Shaded error bars represent a .95 confidence interval.*

[*Dorfman HM, Gershman SJ. 2019. Controllability governs the balance between Pavlovian and instrumental action selection. Nat Commun* ***10****: 5826.*](http://paperpile.com/b/5HHtTA/gi7r)
